# Supplementary material for: Rapid epigenetic adaptation to uncontrolled heterochromatin spreading
Source: eLife. 2015 Mar 16;4:e06179. doi: 10.7554/eLife.06179 (PMC4395908; doi:10.7554/eLife.06179)
Supplement: Supplementary file 1. — List of heterochromatin peaks in different genetic background. DOI: http://dx.doi.org/10.7554/eLife.06179.018 [file elife06179s001.xlsx]

## Sheet: Table S1
Supplementary File 1. List of heterochromatin peaks in different genetic background
Gene	Strains
	WT	mst2∆	epe1∆	mst2∆ epe1∆*	mst2∆ epe1∆ meu6∆*	mst2∆ epe1∆ swi6∆
SPAC806.04c & SPAC806.05	Y	Y	Y	Y	Y	Y
dak2		Y				Y
mcp7 & ubp8		Y	Y	Y	Y	Y
git8 & SPAC23H3.14		Y		Y	Y	Y
LTR & SPAC27D7.11c		Y	Y	Y	Y	Y
SPAC30C2.07& SPAC30C2.08		Y		Y	Y	Y
mcp5		Y	Y	Y	Y	Y
mei4		Y	Y	Y	Y	Y
mug142 & SPBC3H7.08c		Y		Y	Y	Y
SPBC24C6.09c & LTR	Y	Y	Y	Y	Y	Y
SPBC17G9.13c & eno1		Y		Y	Y	Y
SPNCRNA.1553 & SPBC19C7.05				Y	Y	Y
mbx2		Y		Y	Y	Y
mae2	Y	Y	Y
SPCC1682.08c & gcg1		Y		Y	Y	Y
SPCC1259.02c & rpa12		Y	Y	Y	Y	Y
tmp1 & SPCC70.08c		Y	Y	Y	Y	Y
SPCC11E10.01 & gpi8 & mug1				Y	Y	Y
fap2 & SPAC139.05					Y	Y
arv1 & sdh2					Y	Y
mug8 & SPAC32A11.02c					Y	Y
SPAC8C9.04 & SPAC8C9.05						Y
SPBC1271.09						Y
sol1						Y
SPBC1652.01						Y
meu6 & clr4				Y
rik1 & SPCC11E10.09c					Y
