# Supplementary material for: Rapid epigenetic adaptation to uncontrolled heterochromatin spreading
Source: eLife. 2015 Mar 16;4:e06179. doi: 10.7554/eLife.06179 (PMC4395908; doi:10.7554/eLife.06179)
Supplement: Supplementary file 2. — List of mutations identified in SGA screen. DOI: http://dx.doi.org/10.7554/eLife.06179.019 [file elife06179s002.xlsx]

## Sheet: Table S2
Supplementary File 2. List of mutations identified in SGA screen.
Systematic Name	Common Name	Description	Score
SPBC428.08c	clr4	histone H3 lysine methyltransferase Clr4	3
SPCC613.12c	raf1	Rik1-associated factor Raf1	3
SPCC970.07c	raf2	Rik1-associated factor Raf2	3
SPBC800.03	clr3	histone deacetylase (class II) Clr3	3
SPBC16D10.07c	sir2	Sir2 family histone deacetylase Sir2	3
SPAC12G12.13c	cid14	poly(A) polymerase Cid14	3
SPBC15D4.03	slm9	hira protein Slm9	3
SPAC1687.05	pli1	SUMO E3 ligase Pli1	3
SPCC188.02	par1	protein phosphatase regulatory subunit Par1	3
SPAC56F8.04c	ppt1	para-hydroxybenzoate--polyprenyltransferasePpt1	3
SPBC3H7.07c	ser2	phosphoserine phosphatase Ser2 (predicted)	3
SPBC30D10.10c	tor1	phosphatidylinositol kinase Tor1	3
SPBC23G7.12c	rpt6	19S proteasome regulatory subunit Rpt6 (predicted)	3
SPBC19C2.09	sre1	sterol regulatory element binding protein, transcription factor Sre1	3
SPAC1F8.06	fta5	cell surface glycoprotein	3
SPAC30C2.02	mmd1	deoxyhypusine hydroxylase (predicted)	3
SPAC31G5.11	pac2	cAMP-independent regulatory protein Pac2	3
SPAC11G7.04	ubi1	ribosomal-ubiquitin fusion protein Ubi1 (predicted)	3
SPCC24B10.12	cgi121	EKC/KEOPS complex subunit Cgi121 (predicted)	3
SPAC17G8.11c	imt3	mannosyltransferase Imt3	3
SPBC13A2.04c	ptr2	PTR family peptide transporter	3
SPAC222.04c	ies6	Ino80 complex subunit Ies6	3
SPCC126.15c	sec65	signal recognition particle subunit Sec65 (predicted)	3
SPAC227.07c	pab1	protein phosphatase regulatory subunit Pab1	3
SPCC1322.16	phb2	prohibitin Phb2 (predicted)	3
SPAC1952.03	otu2	ubiquitin specific cysteine protease, OTU family, Otu2	3
SPCC188.12	spn6	septin Spn6 (predicted)	3
SPBC577.05c	rec27	meiotic recombination protein Rec27	3
SPAC22F3.11c	snu23	U4/U6 x U5 tri-snRNP complex subunit Snu23 (predicted)	3
SPBC56F2.01	pof12	F-box protein Pof12	3
SPAC1687.05	pli1	SUMO E3 ligase Pli1	3
SPBC582.06c	mcp6	horsetail movement protein Hrs1/Mcp6	3
SPBC16H5.11c	skb1	type II protein arginine N-methyltransferase Skb1	3
SPBC1703.12	ubp9	ubiquitin C-terminal hydrolase Ubp9	3
SPAC637.11	rpm2	mitochondrial ATP-dependent RNA helicase Rpm2	3
SPBC18H10.06c	swd2	Set1C complex subunit	3
SPCC16C4.09	sts5	RNB-like protein	3
SPCC24B10.17	emp24	COPII-coated vesicle component Emp24 (predicted)	3
SPBC776.06c	unassigned	Arf3/6 docking factor (predicted)	3
SPAPB1A11.02	unassigned	esterase/lipase (predicted)	3
SPBC1711.04	unassigned	methylenetetrahydrofolate reductase (predicted)	3
SPAC144.17c	unassigned	6-phosphofructo-2-kinase (predicted)	3
SPBC216.03	unassigned	conserved fungal protein	3
SPBC21C3.12c	unassigned	DUF953 family protein	3
SPBC776.05	unassigned	membrane transporter (predicted)	3
SPAC25B8.06c	unassigned	mitochondrial serine-tRNA ligase (predicted)	3
SPAC22H12.03	unassigned	mitochondrial hydrolase (predicted)	3
SPAC14C4.11	unassigned	polyphosphate synthetase (predicted)	3
SPAC13G7.11	unassigned	mitochondrial respiratory complex assembly protein (predicted)	3
SPCC594.02c	unassigned	conserved fungal protein	3
SPAC1B1.04c	unassigned	poly(A)-specific ribonuclease complex subunit Pan3 (predicted)	3
SPBC18E5.07	unassigned	DUF3210 family protein	3
SPBC691.04	unassigned	mitochondrial ATP-dependent RNA helicase Mss116 (predicted)	3
SPCC622.15c	unassigned	sequence orphan	3
