# Supplementary material for: Rapid epigenetic adaptation to uncontrolled heterochromatin spreading
Source: eLife. 2015 Mar 16;4:e06179. doi: 10.7554/eLife.06179 (PMC4395908; doi:10.7554/eLife.06179)
Supplement: Supplementary file 3. — Yeast strains used in this study. DOI: http://dx.doi.org/10.7554/eLife.06179.020 [file elife06179s003.xlsx]

## Sheet: Table S3
Supplementary File 3. Yeast strains used in this study
Name	Mat	leu1	his2	ura4	ade6	additional genotype	Note
JW1074	Mat1Msmt0	leu1-32	his2-	ura4 DS/E	ade6-210
br373	Mat1Msmt0	leu1-32	his2-	ura4 DS/E	ade6-210	mst2∆::natMX6
JW2018	Mat1Msmt0	leu1-32	his2-	ura4 DS/E	ade6-210	epe1∆::hphMX6
JW1513	Mat1Msmt0	leu1-32	his2-	ura4 DS/E		mst2∆::natMX6, epe1∆::hphMX6
JW1073	h+	leu1-32		ura4 DS/E	ade6-210
br919	Mat1Msmt0	leu1-32	his2-	ura4 DS/E	ade6-216	epe1∆::kanMX4; clr4∆::natMX6
SPJ3637	h+	leu1-32		ura4 DS/E	ade6-210	mst2∆::hphMX6; clr4∆::natMX6
JW2013	Mat1Msmt0	leu1-32	his2-	ura4 DS/E	ade6-210	mst2∆::hphMX6, epe1∆::kanMX4, clr4∆::natMX6
JW1508	h+	leu1-32		ura4 DS/E		mst2∆::natMX6, epe1∆::hphMX6
br375	Mat1Msmt0	leu1-32	his2-	ura4 DS/E	ade6-210	epe1∆::kanMX4
SPJ2867	h+	leu1-32		ura4 DS/E	ade6-210	Flag-clr4; otr::ura4+
SPJ2868	h+	leu1-32		ura4 DS/E	ade6-210	mst2∆::natMX6; Flag-clr4; otr::ura4+
SPJ3856	h+	leu1-32		ura4 DS/E	ade6-210	epe1∆::kanMX4; mst2∆::natMX6; Flag-clr4
SPJ3955	h+	leu1-32		ura4 DS/E	ade6-216	epe1∆::kanMX6; Flag-clr4
br1393	h+	leu1-32		ura4 DS/E	ade6-216	Flag-clr4
al25	Mat1Msmt0	leu1-32	his2-	ura4 DS/E	ade6-216	mst2∆::natMX6, epe1∆::hphMX6, clr4+	clr4+ inherited from mst2∆ epe1∆
al27	Mat1Msmt0	leu1-32	his2-	ura4 DS/E	ade6-216	clr4+	clr4+ inherited from mst2∆ epe1∆
JW2011	Mat1Msmt0	leu1-32	his2-	ura4 DS/E	ade6-210	meu6∆::kanMX6
JW1980	h+	leu1-32		ura4 DS/E	ade6-210	epe1∆::hphMX6, meu6∆::kanMX6
JW1984	Mat1Msmt0	leu1-32	his2-	ura4 DS/E	ade6-210	mst2∆::natMX6, meu6∆::kanMX6
JW1990	Mat1Msmt0	leu1-32	his2-	ura4 DS/E	ade6-210	mst2∆::natMX6, epe1∆::hphMX6, meu6∆::kanMX6
JW2133	h+	leu1-32		ura4 DS/E	ade6-216	Flag-clr4, meu6∆::kanMX6
JW2165	h+	leu1-32		ura4 DS/E		mst2∆::natMX6, epe1∆::hphMX6, meu6∆::kanMX6, Flag-clr4
JW2077	Mat1Msmt0	leu1-32	his2-	ura4 DS/E or D18	ade6-216	mst2∆::natMX6, epe1∆::hphMX6, swi6∆::kanMX4
JW2146	h+	leu1-32		ura4 DS/E or D18	ade6-210	mst2∆::natMX6, rik1∆::kanMX4
JW2150	Mat1Msmt0	leu1-32	his2-	ura4 D18	ade6-210	epe1∆::hphMX6, rik1∆::kanMX4
JW2158	h+	leu1-32		ura4 D18	ade6-210	mst2∆::natMX6, raf1∆::kanMX4
JW2159	Mat1Msmt0	leu1-32	his2-	ura4 D18	ade6-210	epe1∆::hphMX6, raf1∆::kanMX4
JW2149	h+	leu1-32		ura4 DS/E or D18	ade6-210	mst2∆::natMX6, raf2∆::kanMX4
JW2163	Mat1Msmt0	leu1-32	his2-	ura4 DS/E or D18	ade6-210	epe1∆::hphMX6, raf2∆::kanMX4
JW2152	h+	leu1-32		ura4 DS/E or D18	ade6-210	mst2∆::natMX6, swi6∆::kanMX4
JW2154	Mat1Msmt0	leu1-32	his2-	ura4 DS/E or D18	ade6-216	epe1∆::hphMX6, swi6∆::kanMX4
br582	h+	leu1-32		ura4 DS/E	ade6-216	otr::ura4+; mst2∆::natMX6; sir2∆::kanMX4
br1411	Mat1Msmt0	leu1-32	his2-	ura4 D18	ade6-210	epe1∆::hphMX6; sir2∆::kanMX4
sk353	h+	leu1-32		ura4 DS/E	ade6-210	otr::ura4+
JW2072	h+	leu1-32		ura4 D18	ade6-210	otr::ura4+	clr4+ inherited from mst2∆ epe1∆
br909	h+	leu1-32		ura4 DS/E	ade6-216	otr::ura4+; clr4∆::natMX6
br172	Mat1Msmt0	leu1-32	his2-	ura4 DS/E	ade6-210	otr::ura4+
br907	Mat1Msmt0	leu1-32	his2-	ura4 DS/E	ade6-210	clr4∆::natMX6
br259	h+	leu1-32		ura4 DS/E	ade6-210	mst2-Myc-E274Q::kanMX6
JW2455	h+	leu1-32			ade6-210	urg1::hht2-Flag-KanMX6
JW2488	h+	leu1-32			ade6-210	epe1∆::hphMX6, urg1::hht2-Flag-KanMX6
JW2491	h+	leu1-32			ade6-210	epe1∆::hphMX6, dcr1∆::KanMX6, urg1::hht2-Flag-KanMX6
JW2511	h+	leu1-32			ade6-210	mst2∆::NatMX6, urg1::hht2-Flag-KanMX6
JW2515	h+	leu1-32			ade6-216	mst2∆::NatMX6, dcr1∆::KanMX6, urg1::hht2-Flag-KanMX6
JW2514	h+	leu1-32			ade6-216	dcr1∆::KanMX6, urg1::hht2-Flag-KanMX6
JW2435	Mat1Msmto	leu1-32	his2-	ura4 DS/E or D18	ade6∆	mst2∆::NaMX6, IRC1R::ura4+, ade6::swi6-hphMX6
JW1089	Mat1Msmto	leu1-32	his2-	ura4 DS/E or D18	ade6-∆	IRC1R::ura4+, epe1∆::KanMX6, ade6::swi6-hphMX6
JW2527	Mat1Msmto	leu1-32	his2-	ura4-D18	ade6-210	Flag-clr4W31G, otr::ura4+
JW2524	Mat1Msmto	leu1-32	his2-	ura4 DS/E	ade6-210	Flag-clr4W31G
JW2529	Mat1Msmto	leu1-32	his2-	ura4 DS/E or D18	ade6-210	Flag-clr4W31G, mst2∆::NatMX6
JW2531	Mat1Msmto	leu1-32	his2-	ura4 DS/E or D18	ade6-210	Flag-clr4W31G, epe1∆::hphMX6
JW2530	h+	leu1-32		ura4 DS/E or D18	ade6-210	Flag-clr4W31G, epe1∆::hphMX6
br910	Mat1Msmto	leu1-32	his2-	ura4 DS/E	ade6-210	otr::ura4+, clr4∆::NatMX6
br172	Mat1Msmto	leu1-32	his2-	ura4DS/E	ade6-210	otr::ura4+
br395	Mat1Msmto	leu1-32	his2-	ura4DS/E	ade6-216	otr::ura4+; epe1∆::KanMX4, mst2∆::NatMX6
JW2494	Mat1Msmto	leu1-32	his2-	ura4 DS/E or D18	ade6-210	Flag-clr4R406H, otr::ura4+
JW2542	Mat1Msmto	leu1-32	his2-	ura4 DS/E or D18	ade6-210	Flag-clr4R406H, mst2∆::NatMX6, epe1∆::hphMX6, otr::ura4+
JW2488	h+	leu1-32		ura4 DS/E or D18	ade6-216	Flag-clr4R406H, mst2∆::NatMX6
JW2489	Mat1Msmto	leu1-32	his2-	ura4 DS/E or D18	ade6-210	Flag-clr4R406H, mst2∆::NatMX6
JW2501	Mat1Msmto	leu1-32	his2-	ura4 DS/E or D18	ade6-210	Flag-clr4R406H, epe1∆::hphMX6
JW2533	Mat1Msmto	leu1-32	his2-	ura4 DS/E or D18	ade6-210	Flag-clr4R406H, mst2∆::NatMX6, epe1∆::hphMX6
yw65	h+	leu1-32		ura4DS/E	ade6-210	nto1∆::KanMX6
JW1205	Mat1Msmto	leu1-32	his2-	ura4 DS/E	ade6-210	epe1H297A-Flag::KanMX6, mst2∆::NatMX6
JW1132	Mat1Msmto	leu1-32	his2-	ura4 DS/E	ade6-210	epe1H297A-Flag::KanMX6
br372	h+	leu1-32		ura4DS/E	ade6-210	mst2∆::NatMX6
JW1209	Mat1Msmto	leu1-32	his2-	ura4 DS/E	ade6-210	epe1Y307A-Flag::KanMX6, mst2∆::NatMX6
JW1160	Mat1Msmto	leu1-32	his2-	ura4 DS/E	ade6-210	epe1Y307A-Flag::KanMX6
JW2215	Mat1Msmto	leu1-32	his2-	ura4 DS/E or D18	ade6-210	mst2∆::NatMX6, bdf2∆::KanMX6
hy1331	Mat1Msmto	leu1-32	his2-	ura4 DS/E or D18	ade6-210	bdf2∆::KanMX6
JW2463	Mat1Msmto	leu1-32	his2-		ade6-216	dcr1∆::KanMX6
JW2125	Mat1Msmto	leu1-32	his2-	ura4 DS/E	ade6-210	mst2∆::NatMX6, epe1∆::hphMX6, dcr1∆::KanMX6
JW2100	Mat1Msmto	leu1-32	his2-	ura4 DS/E	ade6-210	mmi1∆::KanMX6
JW2109	Mat1Msmto	leu1-32	his2-	ura4 DS/E	ade6-210	mmi1∆::KanMX6, mst2∆::NatMX6, epe1∆::hphMX6
JW2473	Mat1Msmto	leu1-32	his2-	ura4 DS/E	ade6-210	pab2∆::KanMX4
JW2546	Mat1Msmto	leu1-32	his2-	ura4 DS/E or D18	ade6-210	pab2∆::KanMX4, mst2∆::NatMX6, epe1∆::hphMX6
JW2237	Mat1Msmto	leu1-32	his2-	ura4 DS/E or D18	ade6-210	mst2∆::NatMX6, epe1∆::hphMX6, meu6-Flag::KanMX6
br1049	h+	leu1-32		ura4 DS/E	ade6-210	meu6-Flag::KanMX6
