# Supplementary material for: Rapid epigenetic adaptation to uncontrolled heterochromatin spreading
Source: eLife. 2015 Mar 16;4:e06179. doi: 10.7554/eLife.06179 (PMC4395908; doi:10.7554/eLife.06179)
Supplement: Supplementary file 4. — Primers used in this study. DOI: http://dx.doi.org/10.7554/eLife.06179.021 [file elife06179s004.xlsx]

## Sheet: Table S4
Supplementary File 4. Primers used in this study
Primer name	Sequence	Annotation
meu6-B	TTACATTTGATTACGCTGGTGC	for real time PCR at clr4+
clr4-probe 1R	ACGACAATTAGCGGAACCAC
clr4-RT-rev	CTTCACTTCATTTCTCGTCT	for qRT-PCR at clr4+
clr4-RTG-fwd	AGATTTTCGCGGGAATTGAA
Act1 RTp A	GGTGGTATGAAGCCGTTGAT	for real time PCR at act1+
Act1 RTp B	AGTGCTAACGCTGTGTGTGG
rik1-G	TTCGTCAATTAGCTGCGCCTT	for real time PCR at rik1+
rik1-H	AATTCACCACTTCCGCTAGAAAC
dh RT 3	AATGACAAAGGTGCCGAATC	for real time PCR at dh
dh RT 4	CGTTGAATGTTGTTGCTTTCA
os-IRC1R-RT-A	GAGAGGTTTCTTATCGTGCTATC	for real time PCR outside IRC1R
os-IRC1R-RT-B	GAGTGTAAACTTAGTGTGAGCG
mei4 RT C	AATGTGCACCTTCAAGTCCTACG	for real time PCR at mei4+
mei4 RT D	GAGCAATTGACTTGAAGGATTCC
Mat-RT-rv	CTGACAGGTCGTAAAACTCAGAG	for real time PCR at mating-type region
Mat-fw	TGCTTGGTGTGATGATCATTGT
