# Supplementary figures and images for: Rapid epigenetic adaptation to uncontrolled heterochromatin spreading
Source: eLife journal article supplement (doi:10.7554/elife.06179), 2015-03-16

Figure 5 – Figure supplement 3

**A**

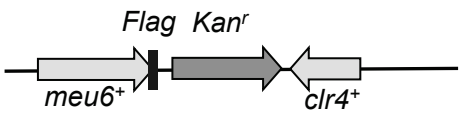

**B**

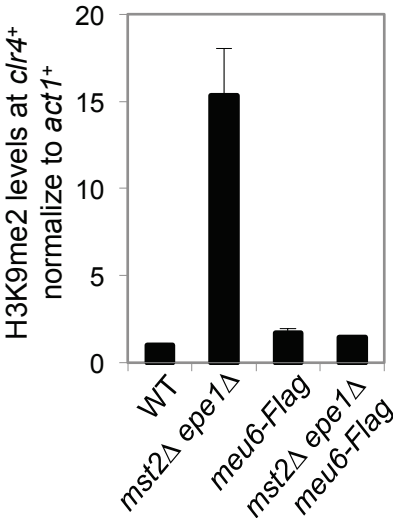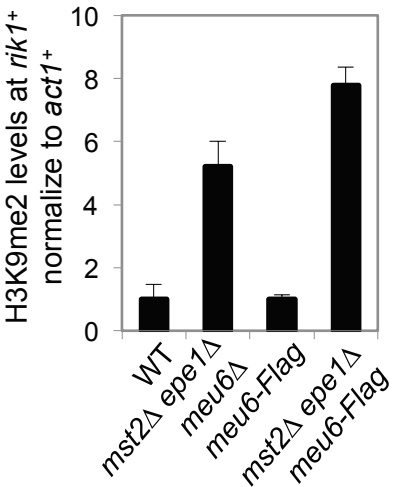

Supplement: supp [file elife-06179-supp-v1.zip]

Figure 2 – Figure supplement 1

A

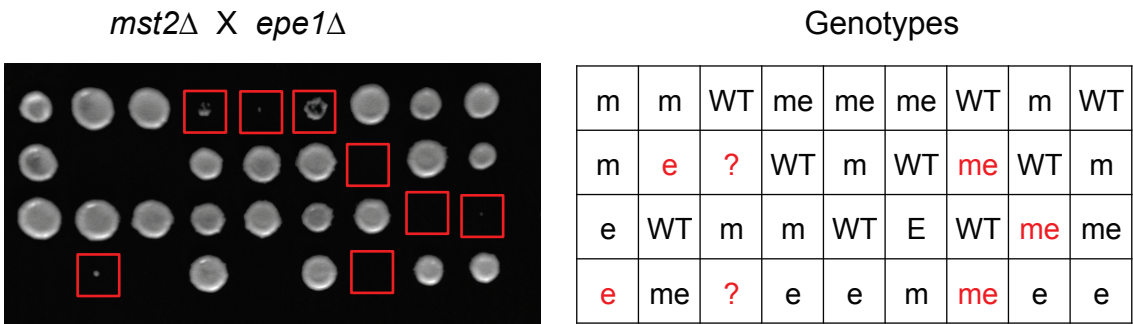

B

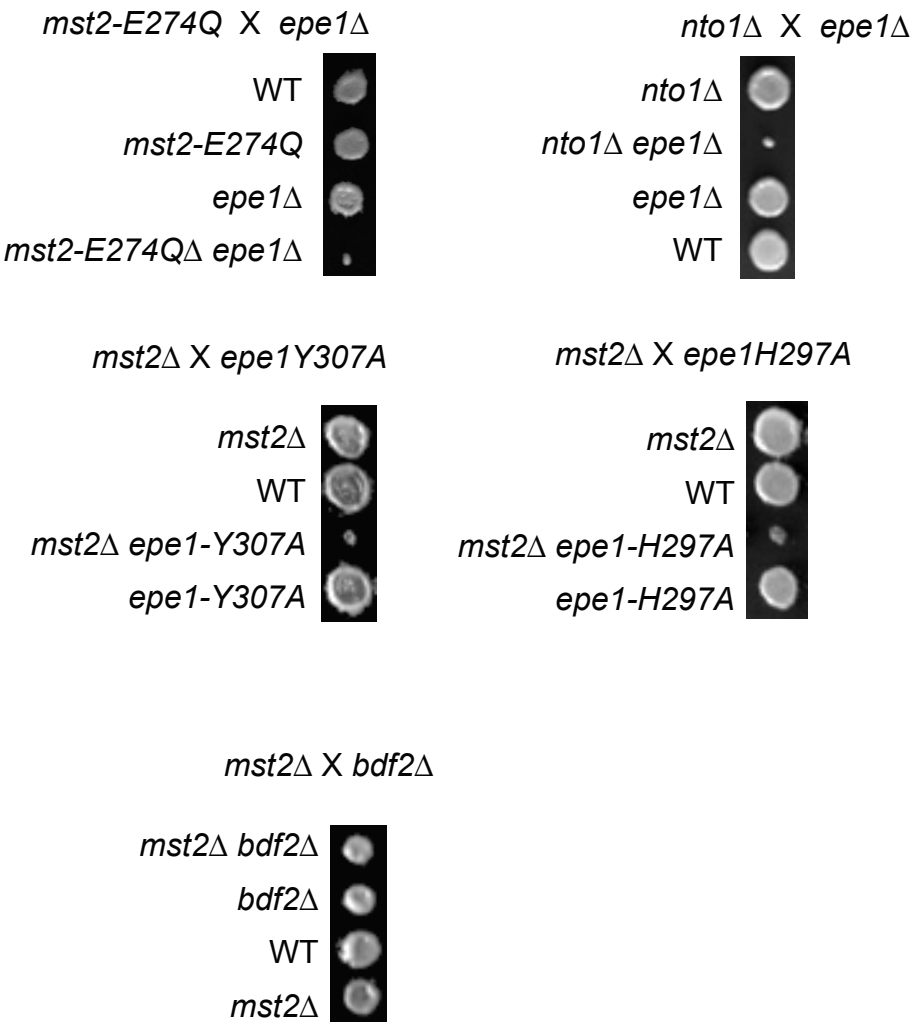

Supplement: supp [file elife-06179-supp-v1.zip]

Figure 1 – Figure supplement 1

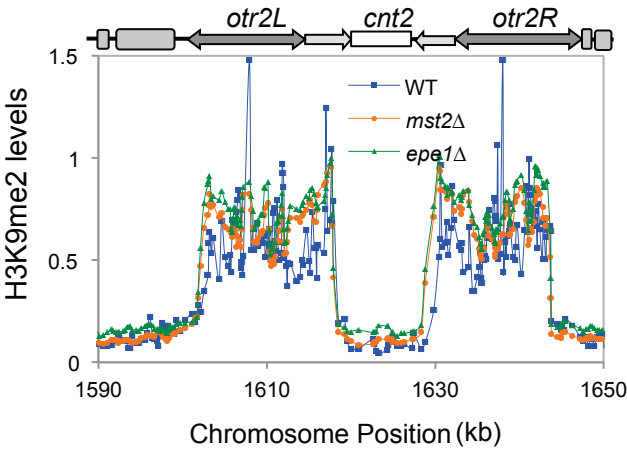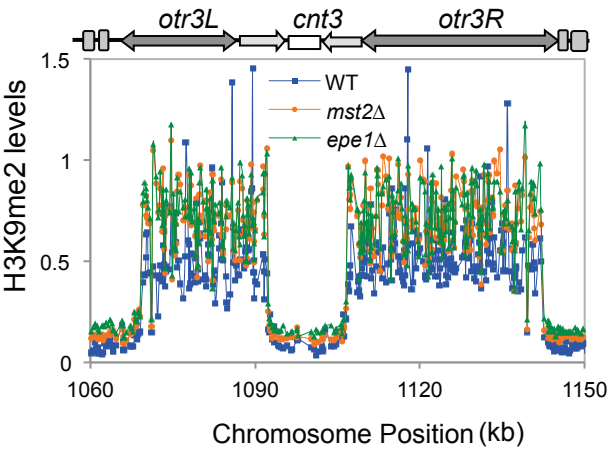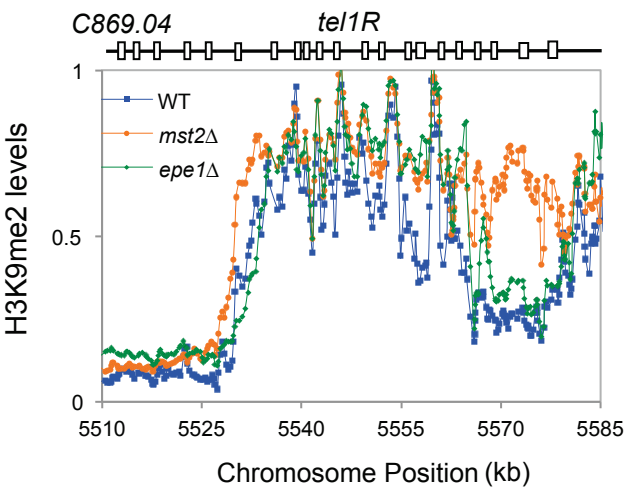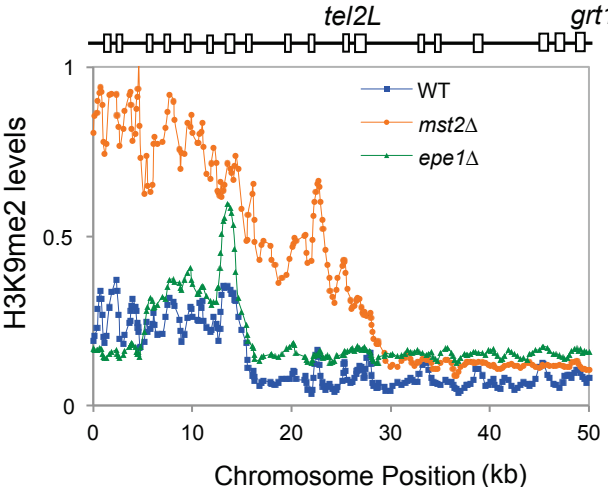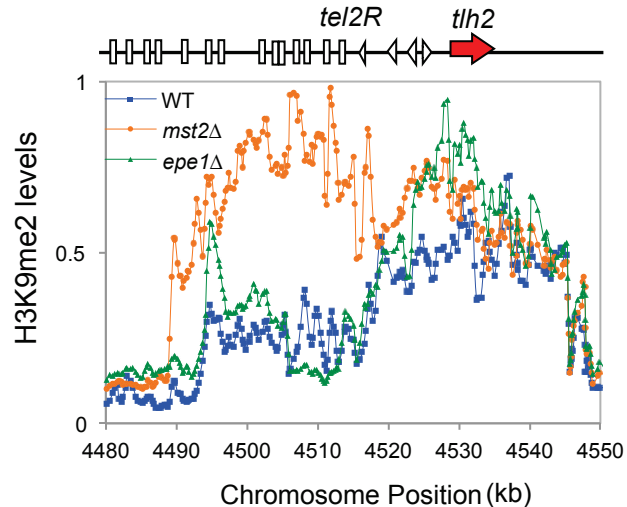

Supplement: supp [file elife-06179-supp-v1.zip]

Figure 6 – Figure supplement 1

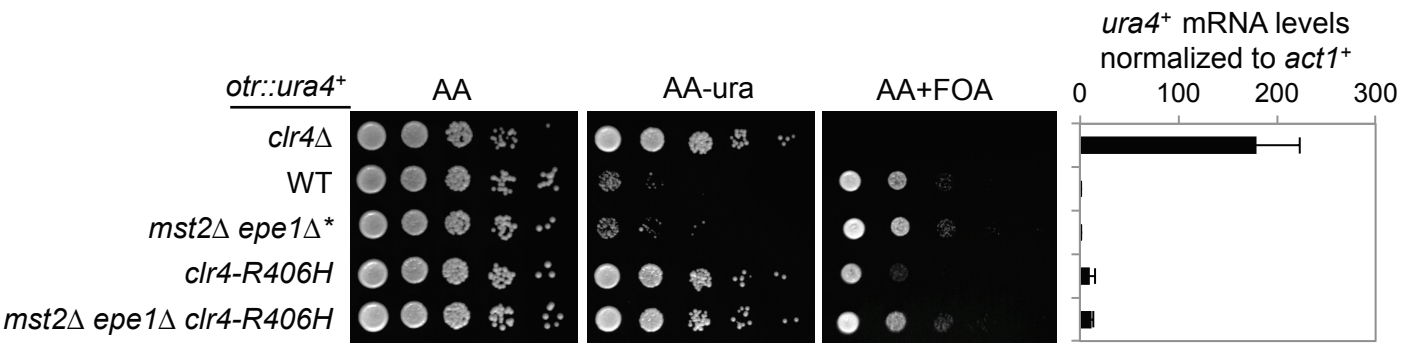

Supplement: supp [file elife-06179-supp-v1.zip]

**A**

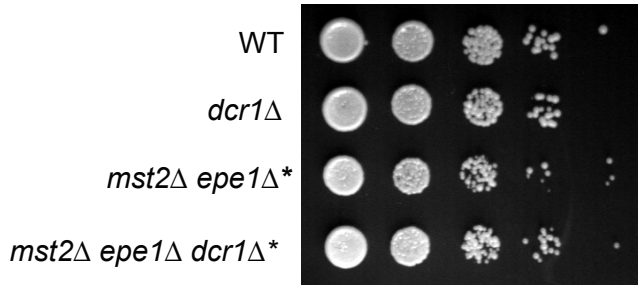

**B**

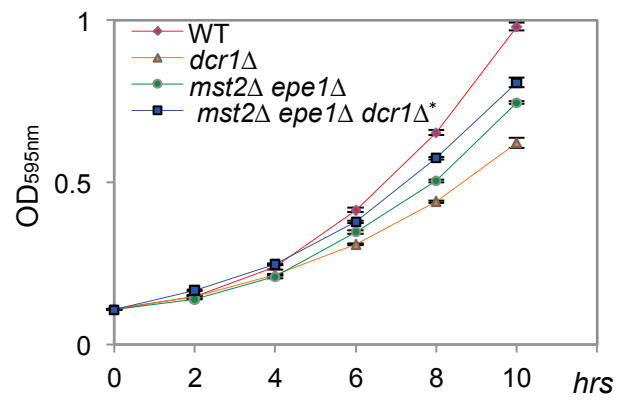

**C**

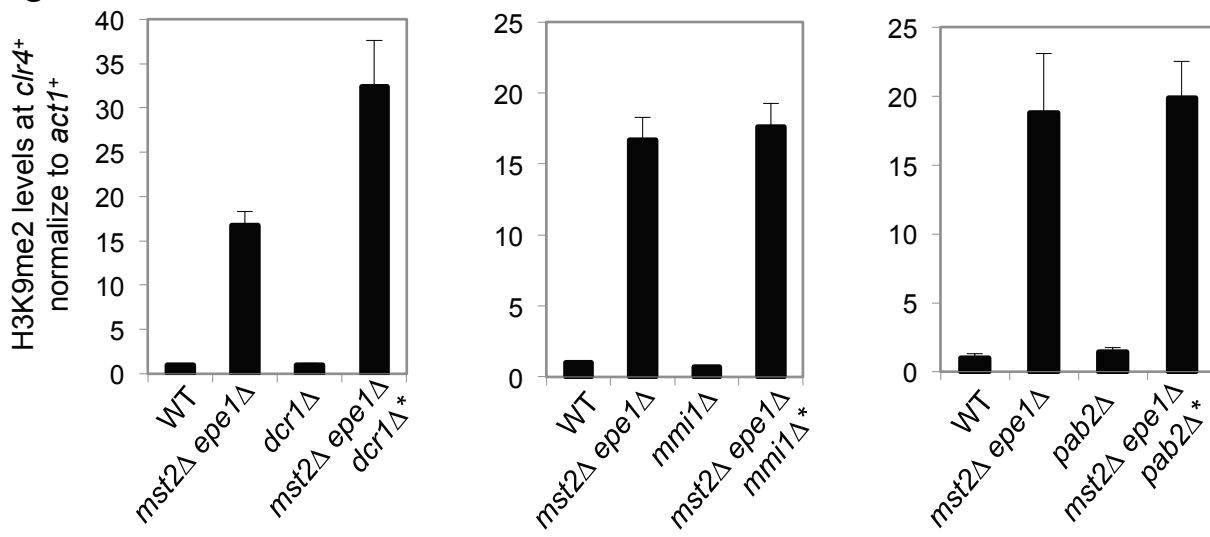

Supplement: supp [file elife-06179-supp-v1.zip]

Figure 3 – Figure supplement 1

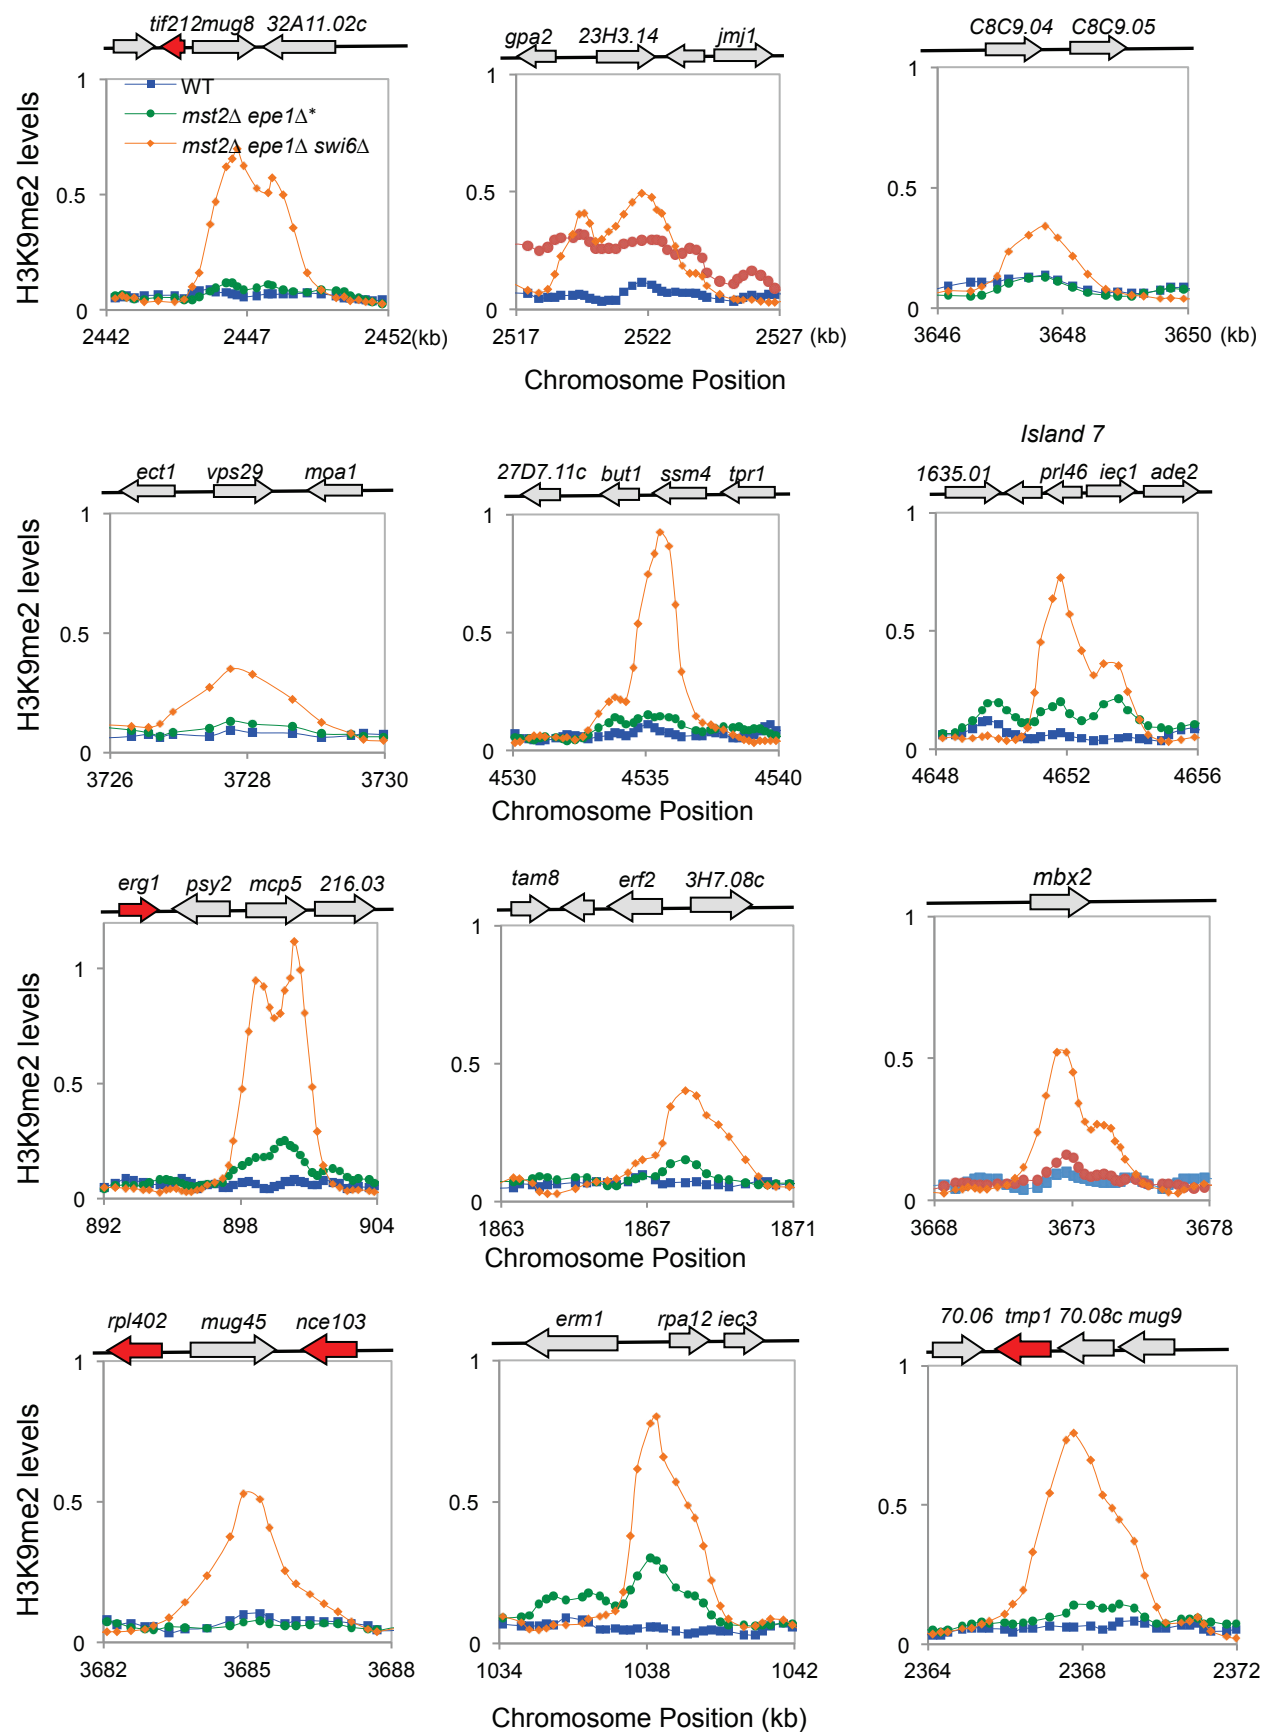

Supplement: supp [file elife-06179-supp-v1.zip]

Figure 2 – Figure supplement 2

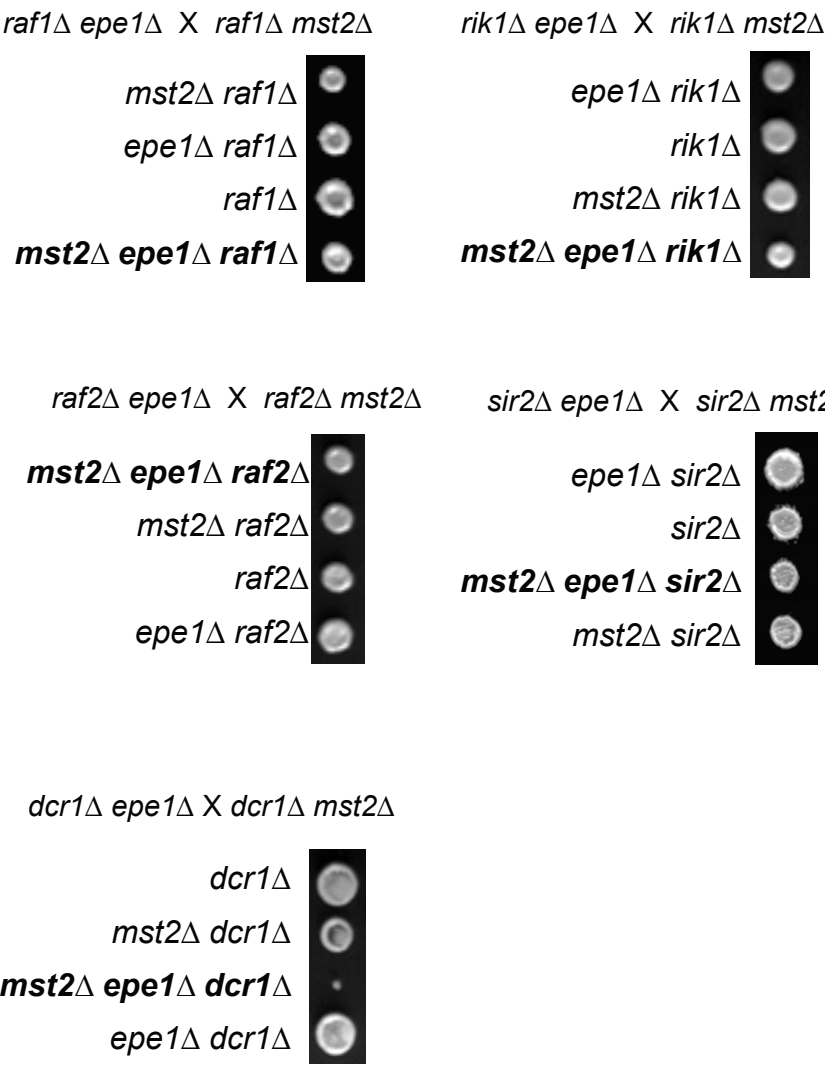

Supplement: supp [file elife-06179-supp-v1.zip]

Figure 5 – Figure supplement 2

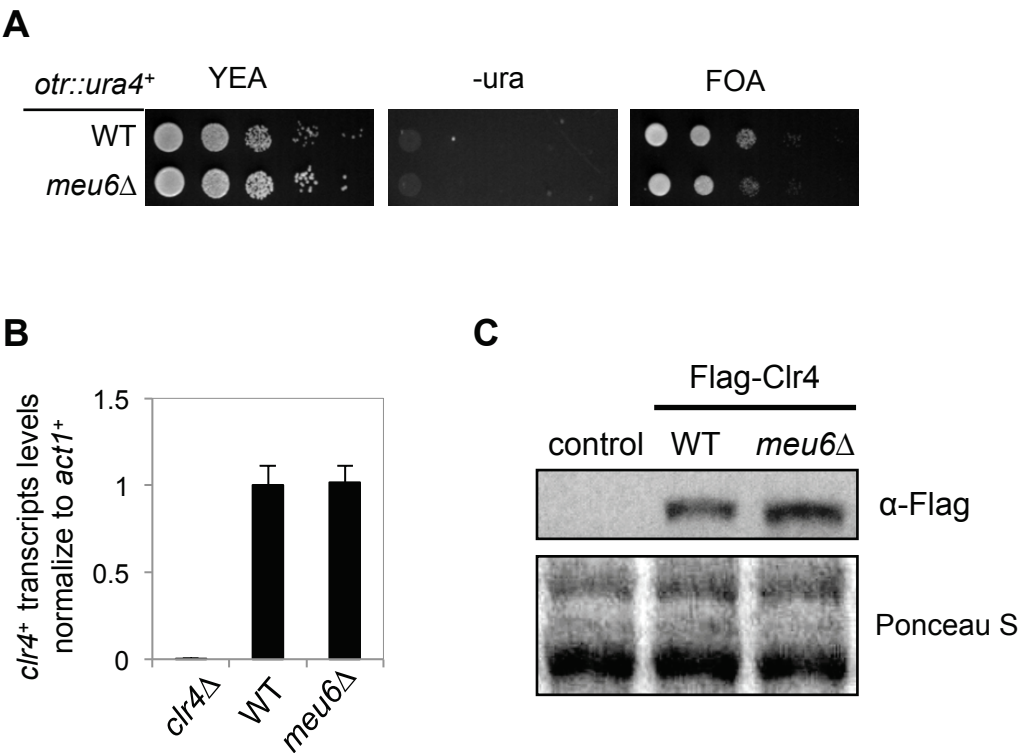

Supplement: supp [file elife-06179-supp-v1.zip]
